# Supplementary material for: Architectural design and phase engineering of N/B-codoped TiO2(B)/anatase nanotube assemblies for high-rate and long-life lithium storage
Source: Royal Society of Chemistry journal article supplement (doi:10.1039/c5ta06884c), 2015-01-01
Supplement: c5ta06884c1.pdf [file c5ta06884c1.pdf]

## Supplementary Material

### Architectural design and phase engineering of N/B-codoped TiO<sub>2</sub>(B)/anatase nanotube assemblies for high-rate and long-life lithium storage

Chaoji Chen,<sup>a</sup> Xianluo Hu,<sup>a,\*</sup> Bao Zhang,<sup>b</sup> Ling Miao<sup>b</sup> and Yunhui Huang<sup>a,\*</sup>

<sup>a</sup> State Key Laboratory of Materials Processing and Die & Mould Technology, School of Materials Science and Engineering, Huazhong University of Science and Technology, Wuhan 430074, P. R. China

<sup>b</sup> Wuhan National Laboratory for Optoelectronics, and School of Optical and Electronic Information, Huazhong University of Science and Technology, Wuhan 430074, P. R. China

\*Correspondence to: huxl@mail.hust.edu.cn

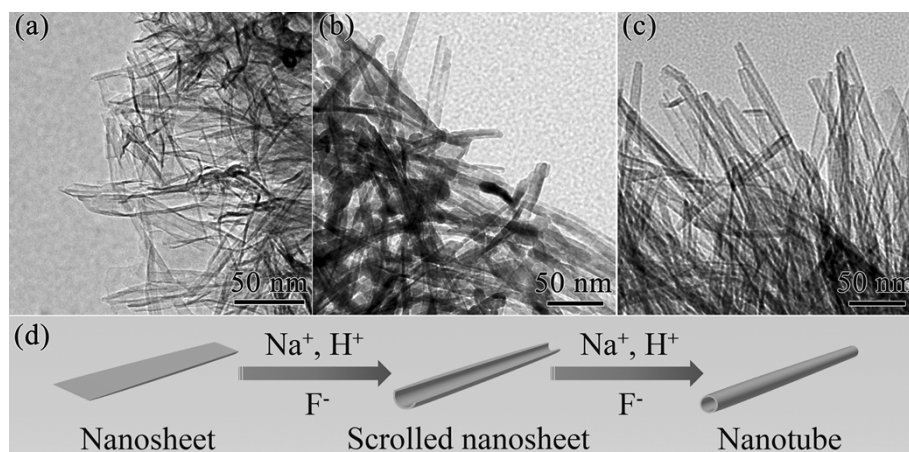

**Fig. S1.** TEM images of the products prepared for different ionothermal reaction time: (a) 6 h, (b) 12 h, and (c) 30 h. (d) Illustration of the time-dependent morphology evolution.

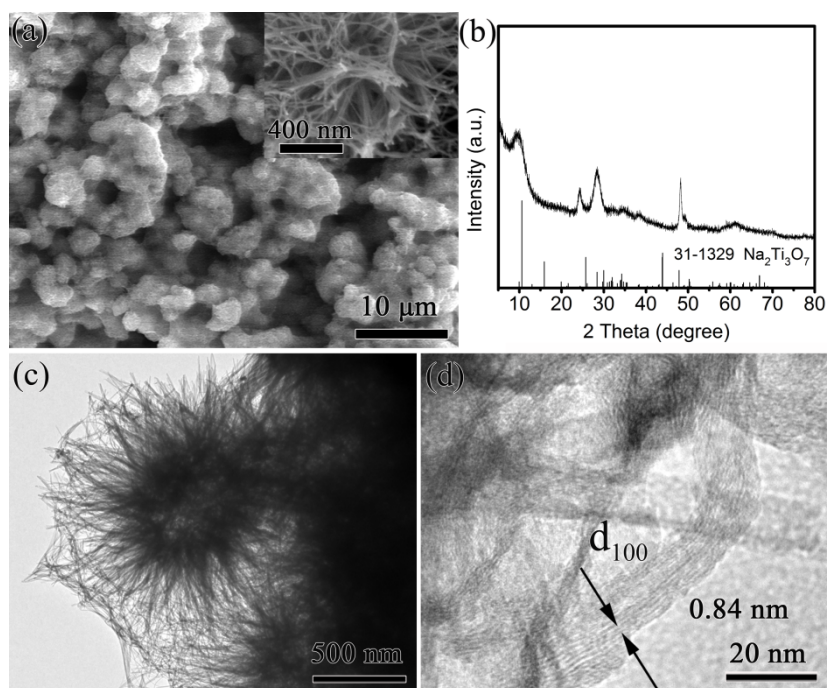

**Fig. S2.** (a) SEM image (inset shows the magnified SEM image), (b) XRD pattern, (c) TEM image, and (d) HRTEM image for the  $\text{Na}_2\text{Ti}_3\text{O}_7$  (NTO) product.

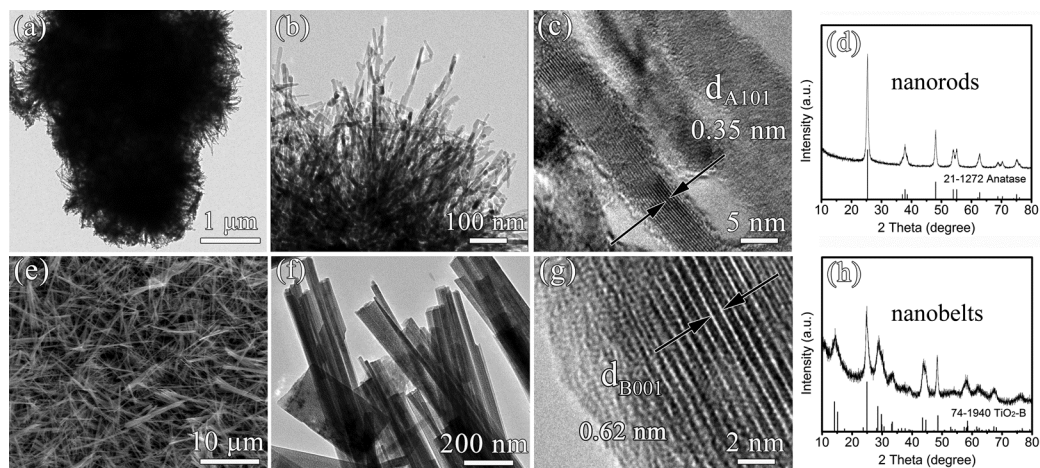

**Fig. S3.** (a,b,c,d) SEM, TEM, HRTEM images and XRD pattern for the  $\text{TiO}_2$  nanorod assemblies. (e,f,g,h) TEM, HRTEM images and XRD pattern for the  $\text{TiO}_2(\text{B})$  nanobelts.

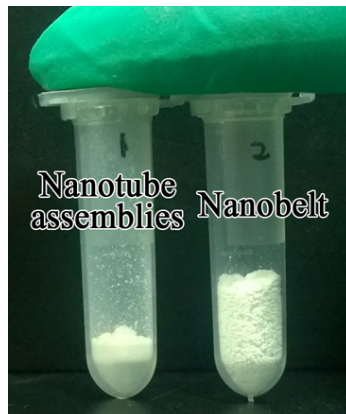

**Fig. S4.** Volume comparison of the  $\text{TiO}_2$  nanotube assemblies and the  $\text{TiO}_2(\text{B})$  nanobelts with the same mass.

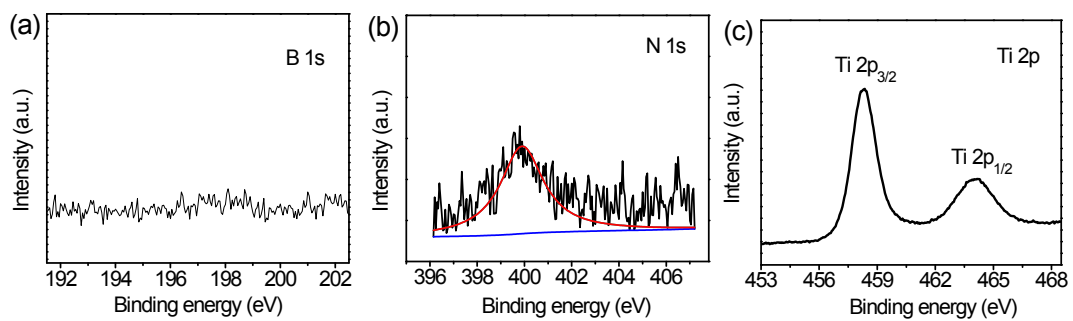

**Fig. S5.** High resolution XPS spectra of  $\text{TiO}_2$  nanorod assemblies: (a) B 1s; (b) N 1s; and (c) Ti 2p.

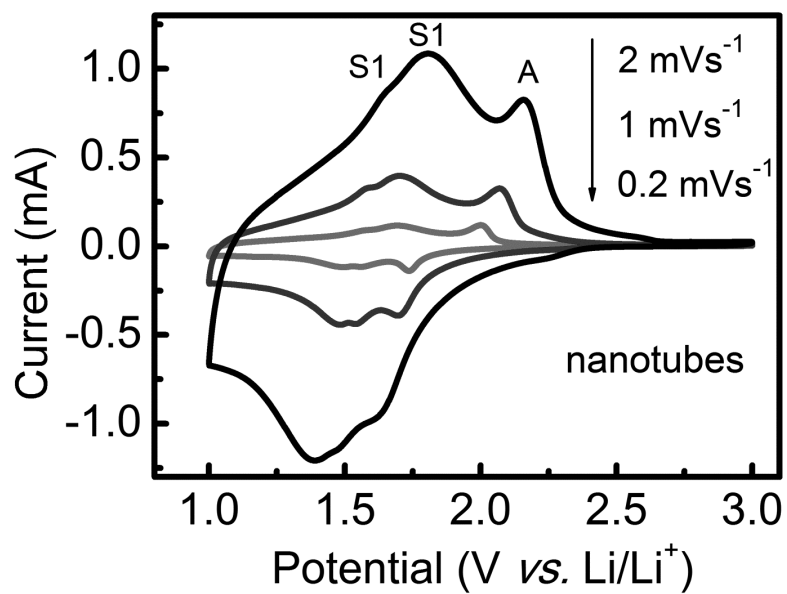

**Fig. S6.** CV curves of the TiO<sub>2</sub> nanotube assemblies at different scan rates.

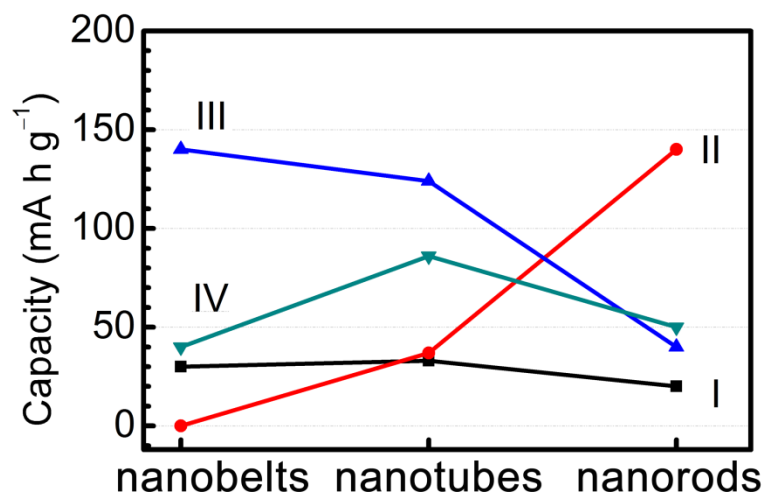

**Fig. S7.** Capacity contribution varies upon the TiO<sub>2</sub> products from Region I to IV.

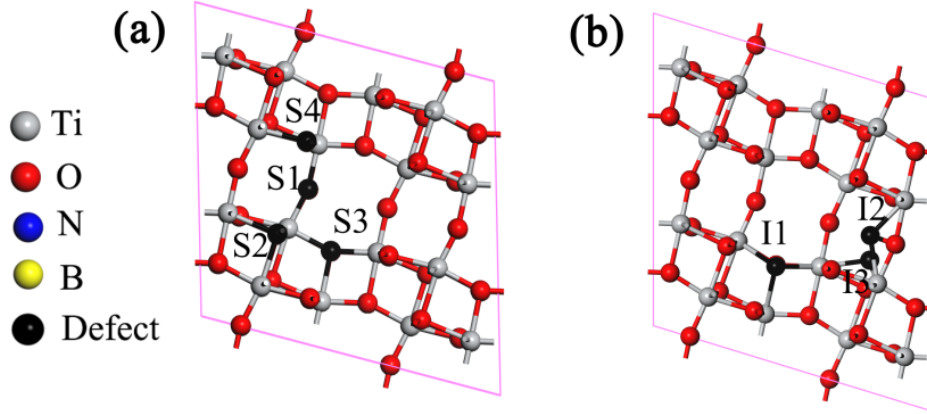

**Fig. S8.** Possible N/B doping sites in TiO<sub>2</sub>(B). (a) O atoms substituted sites by nitrogen or boron; (b) interstitial sites for nitrogen doping.

### Supplementary Method: DFT calculation details

Considering the majority of the phase composition in the product of TiO<sub>2</sub> nanotube assemblies is TiO<sub>2</sub>(B) (~81%), only TiO<sub>2</sub>(B) was taken into account in the first principle calculations. Nitrogen (~2 at.%) can be located in the lattice of TiO<sub>2</sub> interstitially or substitutionally and boron (~1 at.%) can be located in substitutionally combining our XPS results. The formation possibilities of three types of doping are investigated.

To discuss the N-doped TiO<sub>2</sub>, we calculated interstitial and substitutional sites respectively. The possible substitutional and interstitial doping sites are shown in Figure S8a and b, respectively. The following formulas are used to calculate the N-doped formation energy,  $E_f$ , and listed in Table S1.

For O atoms substituted by nitrogen:

$$E_f = E_{doped-TiO_2} - E_{bulk-TiO_2} - \frac{1}{2}E_{N_2(g)} + \frac{1}{2}E_{O_2(g)}$$

For interstitial nitrogen doping:

$$E_f = E_{doped-TiO_2} - E_{bulk-TiO_2} - \frac{1}{2}E_{N_2(g)}$$

Here  $E_{doped-TiO_2}$  is the total energy of N-doped TiO<sub>2</sub>-B bulk,  $E_{bulk-TiO_2}$  is the total energy of TiO<sub>2</sub>(B) bulk,  $E_{N_2(g)}$  is the energy of one N<sub>2</sub> molecular, and  $E_{O_2(g)}$  is the energy of one O<sub>2</sub> molecular.

The formation energy shows that the S<sub>N</sub>4 and I<sub>N</sub>2 sites can be formed easier than the other sites. Thus, these two sites are chosen for N doping sites in the N-doped TiO<sub>2</sub>. Figure 7c shows the relaxed structure of mixed N-doped TiO<sub>2</sub>. Based on the above analysis, B doping sites in the N/B-codoped TiO<sub>2</sub>(B) are calculated, and the

influences between defects are ignored. The codoped defects formation energy,  $E_f$ , is defined as follow and listed in Table S1.

$$E_f = E_{\text{doped-TiO}_2} - E_{\text{bulk-TiO}_2} - E_{N_2(\text{g})} - E_{\alpha-B} + \frac{1}{2} E_{O_2(\text{g})}$$

Here  $E_{\alpha-B}$  refers to the energy of one boron atom in the  $\text{TiO}_2(\text{B})$  bulk. The results show that site  $S_{B4}$  is more stable. These structures shown in Figure 7a, c and e are employed to represent undoped  $\text{TiO}_2$ , N-doped  $\text{TiO}_2$ , N/B-codoped  $\text{TiO}_2$  and their density of states (DOSs) are displayed in Figure 7b, d and f.

**Supplementary Table S1.** Defect formation energy of  $\text{TiO}_2(\text{B})$ .

| Sites           | $S_{N1}$ | $S_{N2}$ | $S_{N3}$ | $S_{N4}$ | $I_{N1}$ | $I_{N2}$ | $I_{N3}$ | $S_{B1}$ | $S_{B2}$ | $S_{B3}$ | $S_{B4}$ |
|-----------------|----------|----------|----------|----------|----------|----------|----------|----------|----------|----------|----------|
| $E_f/\text{eV}$ | 5.67     | 5.54     | 5.73     | 5.46     | 4.34     | 4.06     | 5.22     | 13.4     | 12.6     | 12.6     | 12.0     |

We should also note that the calculated band gap of pure  $\text{TiO}_2(\text{B})$  is about 2.344 eV (see Figure 7b) while the experimental value is reported to be 3–3.2 eV. The underestimation always exists in the band gap calculations due to the well-known limitation of the DFT theory. However, our discussions about energy gap will not be affected because only the relative energy changes are to be concerned, and the trend of the energy gap is expected to be reasonable and reliable.<sup>1,2</sup>

**Supplementary Table S2.** The diffusion coefficients ( $D_{Li}$ ) of the three electrodes and the corresponding data.

| Electrode | $\delta$ | $dE/dx$ | A ( $\text{cm}^{-2}$ ) | $D_{Li}$               |
|-----------|----------|---------|------------------------|------------------------|
| nanobelts | 66.86    | 1.69    | 0.35                   | $1.27 \times 10^{-14}$ |
| nanotubes | 5.85     | 0.94    | 1.23                   | $5.68 \times 10^{-14}$ |
| nanorods  | 97.92    | 0.85    | 0.46                   | $8.72 \times 10^{-15}$ |

## Supplementary references

- 1 Yang, K.; Dai, Y.; Huang, B.; Han, S. *J. Phys. Chem. B* **2006**, 110, 24011.
- 2 Yang, K.; Dai, Y.; Huang, B. *J. Phys. Chem. C* **2007**, 111, 12086.
